# Supplementary material
Source: HighWire-hosted journal article supplement (doi:10.1101/rna.033019.112)
Supplement: SuppFigsS1_S2.docx [file SuppFigsS1_S2.docx]

**Supplementary Information**

**
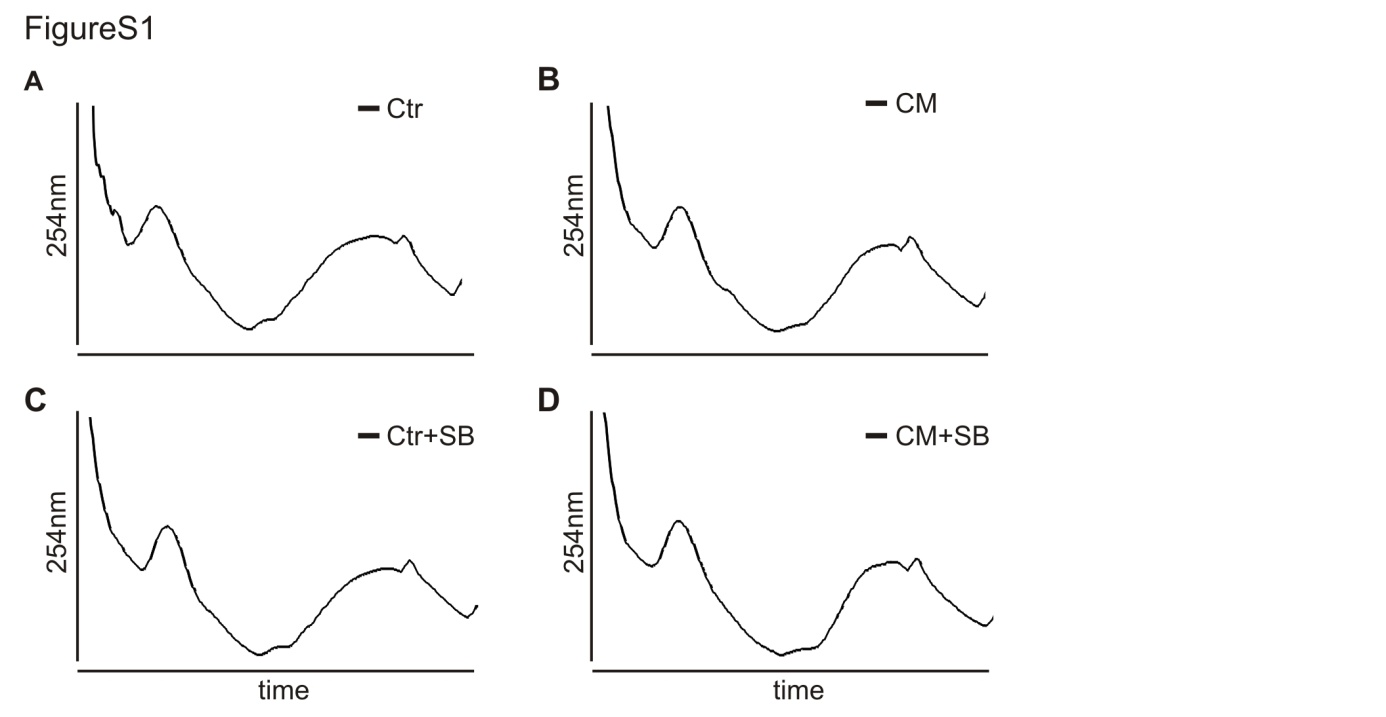
**

**Figure S1: Polysomal profiles do not change upon various treatments**

MCF7 cells were treated for 4 h with Ctr or CM alone or in combination with p38-MAPK inhibitor SB203580 [10 µM] followed by polysomal fractionation.


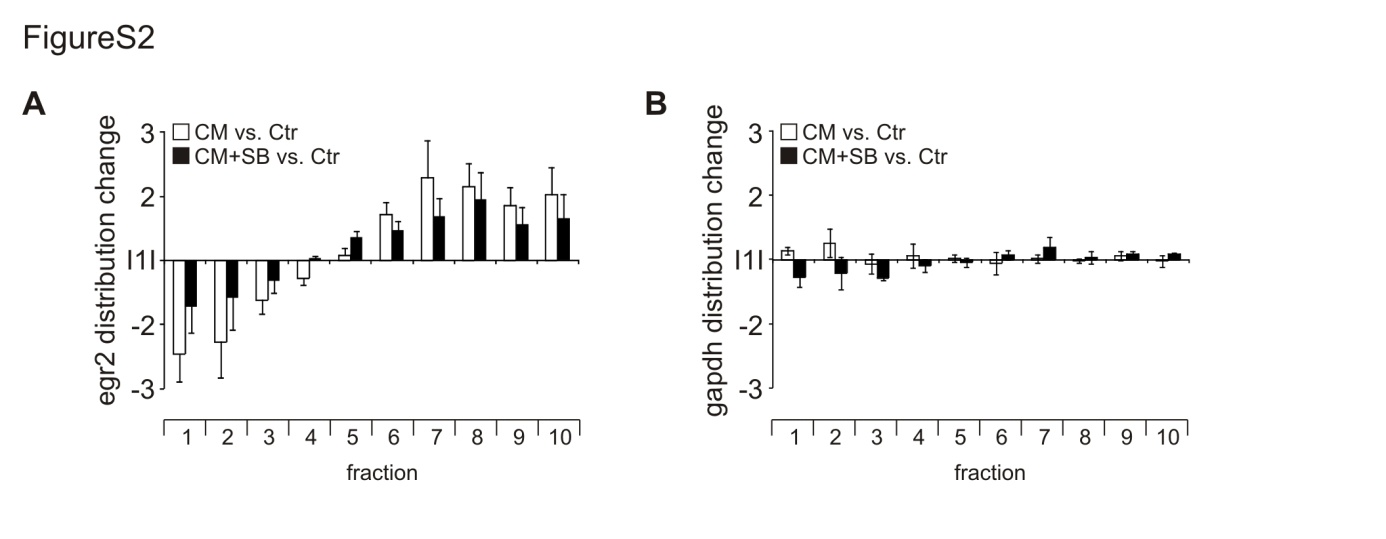


**Figure S2: Distribution of egr2 and gapdh mRNA in single fractions**

MCF7 cells were treated for 4 h with Ctr, CM alone (white bars) or in combination with SB203580 [10 µM] (black bars). Using polysomal fractionation und RT-qPCR, changes of egr2 (A) and gapdh (B) mRNA distribution were analyzed relative to Ctr. Data are presented as means ± SEM (n ≥ 3).
